# Supplementary material
Source: PubMed Central journal article supplement (PMC4431507)
Supplement: ct501138c_si_001.pdf [file ct501138c_si_001.pdf]

This material is available free of charge via the Internet at <http://pubs.acs.org>

Table S1. Partial atomic charges (in e.u.) for monosaccharides

| Atom name      | $\alpha$ -D-gal | $\beta$ -D-gal | $\alpha$ -D-glc | $\beta$ -D-glc | $\alpha$ -D-man | $\beta$ -D-man | $\alpha$ -fuc | $\beta$ -fuc | $\alpha$ -nag | $\beta$ -nag | $\alpha$ -nga | $\beta$ -nga | $\alpha$ -L-xyl | $\beta$ -L-xyl | $\alpha$ -gcu | $\beta$ -gcu |
|----------------|-----------------|----------------|-----------------|----------------|-----------------|----------------|---------------|--------------|---------------|--------------|---------------|--------------|-----------------|----------------|---------------|--------------|
| C1             | 0.066           | 0.017          | 0.083           | 0.135          | -0.036          | 0.145          | 0.180         | -0.047       | 0.058         | 0.129        | 0.019         | -0.050       | 0.103           | 0.123          | -0.080        | -0.128       |
| H1             | 0.157           | 0.146          | 0.157           | 0.101          | 0.217           | 0.073          | 0.130         | 0.175        | 0.184         | 0.099        | 0.162         | 0.162        | 0.147           | 0.100          | 0.173         | 0.171        |
| C <sub>2</sub> | 0.115           | 0.084          | 0.077           | 0.055          | 0.058           | 0.002          | 0.144         | 0.229        | -0.057        | -0.034       | 0.003         | -0.042       | 0.064           | 0.042          | 0.094         | 0.079        |
| H <sub>2</sub> | 0.136           | 0.165          | 0.132           | 0.126          | 0.098           | 0.108          | 0.145         | 0.125        | 0.181         | 0.171        | 0.185         | 0.215        | 0.127           | 0.126          | 0.139         | 0.144        |
| O <sub>2</sub> | -0.562          | -0.572         | -0.563          | -0.560         | -0.549          | -0.519         | -0.632        | -0.613       | -             | -            | -             | -            | -0.552          | -0.555         | -0.575        | -0.558       |
| HO2            | 0.358           | 0.386          | 0.369           | 0.381          | 0.392           | 0.386          | 0.403         | 0.395        | -             | -            | -             | -            | 0.364           | 0.381          | 0.352         | 0.359        |
| C3             | 0.102           | 0.079          | 0.127           | 0.100          | 0.162           | 0.127          | 0.090         | 0.097        | 0.182         | 0.125        | 0.113         | 0.094        | 0.107           | 0.063          | 0.124         | 0.036        |
| H3             | 0.105           | 0.114          | 0.108           | 0.120          | 0.074           | 0.088          | 0.102         | 0.110        | 0.117         | 0.118        | 0.111         | 0.121        | 0.123           | 0.135          | 0.118         | 0.145        |
| O3             | -0.567          | -0.563         | -0.586          | -0.560         | -0.583          | -0.549         | -0.594        | -0.628       | -0.544        | -0.551       | -0.560        | -0.583       | -0.558          | -0.559         | -0.590        | -0.562       |
| HO3            | 0.385           | 0.386          | 0.390           | 0.378          | 0.378           | 0.365          | 0.378         | 0.404        | 0.356         | 0.362        | 0.366         | 0.380        | 0.369           | 0.376          | 0.365         | 0.357        |
| C4             | 0.017           | 0.030          | 0.097           | 0.101          | 0.180           | 0.145          | 0.078         | 0.082        | -0.002        | 0.101        | 0.019         | 0.058        | 0.062           | 0.152          | 0.052         | 0.034        |
| H4             | 0.085           | 0.118          | 0.107           | 0.115          | 0.111           | 0.118          |               | 0.082        | 0.148         | 0.121        | 0.113         | 0.109        | 0.117           | 0.103          | 0.103         | 0.134        |
| O4             | -0.530          | -0.589         | -0.624          | -0.632         | -0.663          | -0.627         | -0.661        | -0.600       | -0.604        | -0.627       | -0.583        | -0.593       | -0.579          | -0.602         | -0.660        | -0.606       |
| C5             | 0.016           | 0.026          | 0.089           | 0.084          | 0.090           | 0.021          | -0.050        | 0.150        | 0.105         | 0.021        | 0.037         | 0.017        | 0.002           | -0.056         | 0.122         | 0.055        |
| H5(1)          | 0.099           | 0.041          | 0.137           | 0.093          | 0.136           | 0.120          | 0.089         | 0.055        | 0.131         | 0.107        | 0.080         | 0.069        | 0.111           | 0.104          | 0.070         | 0.051        |
| H52            | -               | -              | -               | -              | -               | -              | -             | -            | -             | -            | -             | -            | 0.111           | 0.104          | -             | -            |
| C6             | 0.113           | 0.099          | 0.182           | 0.146          | 0.094           | 0.093          | 0.002         | -0.119       | 0.066         | 0.053        | 0.066         | 0.036        | -               | -              | 0.798         | 0.792        |
| H61            | 0.065           | 0.059          | 0.036           | 0.043          | 0.059           | 0.059          | 0.035         | 0.054        | 0.077         | 0.081        | 0.083         | 0.092        | -               | -              | -             | -            |
| H62            | 0.065           | 0.059          | 0.036           | 0.043          | 0.059           | 0.059          | 0.035         | 0.054        | 0.077         | 0.081        | 0.083         | 0.092        | -               | -              | -             | -            |
| H63            | -               | -              | -               | -              | -               | -              | 0.035         | 0.054        | -             | -            | -             | -            | -               | -              | -             | -            |
| O6(a)          | -0.595          | -0.580         | -0.626          | -0.594         | -0.598          | -0.598         | -             | -            | -0.587        | -0.554       | -0.602        | -0.579       | -               | -              | -0.788        | -0.788       |
| O6b            | -               | -              | -               | -              | -               | -              | -             | -            | -             | -            | -             | -            | -               | -              | -0.788        | -0.788       |
| HO6            | 0.395           | 0.412          | 0.424           | 0.415          | 0.414           | 0.421          | -             | -            | 0.393         | 0.392        | 0.391         | 0.395        | -               | -              | -             | -            |
| O5             | -0.318          | -0.208         | -0.441          | -0.382         | -0.386          | -0.330         | -0.288        | -0.379       | -0.410        | -0.342       | -0.246        | -0.203       | -0.395          | -0.321         | -0.336        | -0.210       |
| N2             | -               | -              | -               | -              | -               | -              | -             | -            | -0.566        | -0.512       | -0.562        | -0.460       | -               | -              | -             | -            |
| HN2            | -               | -              | -               | -              | -               | -              | -             | -            | 0.305         | 0.284        | 0.316         | 0.279        | -               | -              | -             | -            |
| C7             | -               | -              | -               | -              | -               | -              | -             | -            | 0.748         | 0.691        | 0.711         | 0.726        | -               | -              | -             | -            |
| O7             | -               | -              | -               | -              | -               | -              | -             | -            | -0.622        | -0.575       | -0.608        | -0.600       | -               | -              | -             | -            |
| C8             | -               | -              | -               | -              | -               | -              | -             | -            | -0.296        | -0.299       | -0.255        | -0.321       | -               | -              | -             | -            |
| H81            | -               | -              | -               | -              | -               | -              | -             | -            | 0.087         | 0.088        | 0.077         | 0.092        | -               | -              | -             | -            |
| H82            | -               | -              | -               | -              | -               | -              | -             | -            | 0.087         | 0.088        | 0.077         | 0.092        | -               | -              | -             | -            |
| H83            | -               | -              | -               | -              | -               | -              | -             | -            | 0.087         | 0.088        | 0.077         | 0.092        | -               | -              | -             | -            |

Table S1 (continued).

| Atom name      | $\alpha$ -sia | $\beta$ -sia |
|----------------|---------------|--------------|
| C2             | -0.240        | -0.144       |
| C1             | 0.866         | 0.875        |
| O1a            | -0.759        | -0.765       |
| O1b            | -0.759        | -0.765       |
| C3             | -0.068        | -0.129       |
| H31            | 0.092         | 0.127        |
| H32            | 0.092         | 0.127        |
| C4             | 0.221         | 0.103        |
| H4             | 0.110         | 0.090        |
| O4             | -0.634        | -0.567       |
| HO4            | 0.354         | 0.317        |
| C5             | -0.027        | 0.030        |
| H5             | 0.146         | 0.155        |
| N5             | -0.502        | -0.350       |
| HN5            | 0.291         | 0.252        |
| C10            | 0.669         | 0.507        |
| O10            | -0.622        | -0.557       |
| C11            | -0.253        | -0.128       |
| H111           | 0.074         | 0.045        |
| H112           | 0.074         | 0.045        |
| H113           | 0.074         | 0.045        |
| C <sub>6</sub> | 0.003         | 0.017        |
| H <sub>6</sub> | 0.148         | 0.080        |
| C <sub>7</sub> | 0.040         | 0.039        |
| H7             | 0.117         | 0.110        |
| O7             | -0.608        | -0.541       |
| HO7            | 0.415         | 0.353        |
| C8             | 0.213         | 0.15         |
| H8             | 0.089         | 0.114        |
| O8             | -0.734        | -0.666       |
| HO8            | 0.442         | 0.399        |
| C9             | 0.148         | 0.067        |
| H91            | 0.045         | 0.069        |
| H92            | 0.045         | 0.069        |
| O9             | -0.688        | -0.661       |
| HO9            | 0.412         | 0.410        |
| O5             | -0.187        | -0.227       |

Table S2. Relative energies (kcal/mol) for conformations of model molecules used for deriving torsional parameters

| Molecule                     |                                                                                     | dihedral                    | Conf. (deg.)       | MP2/6-31G** | ICMFF |
|------------------------------|-------------------------------------------------------------------------------------|-----------------------------|--------------------|-------------|-------|
| 2-methyl-propanoic acid      | 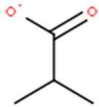   | O-C-C-C                     | -40                | 0.00        | 0.00  |
|                              |                                                                                     |                             | -120               | 0.37        | 0.27  |
| 2,3-butanediol               |    | C-C-C-C                     | 180                | 2.75        | 2.49  |
|                              |                                                                                     |                             | 60                 | 0.00        | 0.00  |
| Propylene glycol             |    | O-C-C-C                     | 60                 | 2.80        | 2.00  |
|                              |                                                                                     |                             | 180                | 0.00        | 0.00  |
| N-(1-methylethyl)-ethanamide |    | C-N-C-C<br>(CCNC trans)     | 80                 | 0.00        | 0.00  |
|                              |                                                                                     |                             | -80                | 0.80        | 1.66  |
|                              |                                                                                     |                             | 180                | 0.00        | 0.00  |
| Methoxy-ethane               |   | C-O-C-C                     | 180                | 0.00        | 0.00  |
|                              |                                                                                     |                             | 75                 | 1.37        | 1.31  |
| Mol 1                        |  | C-O-C1-C2<br>(CO-CC 180°)   | 60                 | 0.00        | 0.00  |
|                              |                                                                                     |                             | 150 (saddle point) | 4.33        | 3.46  |
| Mol 2                        |  | C-O-C1-C2<br>(CO-CC 180°)   | 0                  | 4.53        | 4.61  |
|                              |                                                                                     |                             | 60                 | 0.00        | 0.00  |
|                              |                                                                                     |                             | 180                | 2.62        | 2.74  |
| Mol 4                        |  | C-N-C1-C2<br>(C1N-CC trans) | -150               | 0.29        | 0.29  |
|                              |                                                                                     |                             | -70                | 0.00        | 0.00  |
| Mol 5                        |  | C-N-C1-C2<br>(C1N-CC trans) | -60                | 2.67        | 2.90  |
|                              |                                                                                     |                             | 80                 | 0.71        | 0.88  |

Table S3. Conformational information available for selected di- and tri-saccharides from experimental and theoretical studies

| conformation                                                                                                                                                        | NMR + MD                                      |          | This work                                  |                       |
|---------------------------------------------------------------------------------------------------------------------------------------------------------------------|-----------------------------------------------|----------|--------------------------------------------|-----------------------|
| <b><math>\beta</math>-D-Glcp-(1<math>\rightarrow</math>4)-<math>\alpha</math>-D-Glcp-OMe<sup>a)</sup></b>                                                           |                                               |          |                                            |                       |
|                                                                                                                                                                     | ( $\phi, \psi$ ), deg.                        | <i>p</i> | ( $\phi, \psi$ ), deg.                     | $\Delta E$ , kcal/mol |
| <i>Syn</i>                                                                                                                                                          | (-60,120)                                     | 0.93     | (-60,120)                                  | 0.0                   |
| <i>Anti</i>                                                                                                                                                         | (60,0)                                        | 0.05     | (60,0)                                     | 4.5                   |
| <i>Anti</i>                                                                                                                                                         | (60,120)                                      | 0.02     | (60,120)                                   | 3.0                   |
| <b><math>\beta</math>-D-Galp-(1<math>\rightarrow</math>3)-<math>\beta</math>-D-Glcp-OMe<sup>b)</sup></b>                                                            |                                               |          |                                            |                       |
|                                                                                                                                                                     | ( $\phi, \psi$ ), deg.                        | <i>p</i> | ( $\phi, \psi$ ), deg.                     | $\Delta E$ , kcal/mol |
| <i>Syn</i>                                                                                                                                                          | (46,-2)                                       | -        | (43,-16)                                   | 0.0                   |
| <i>Anti</i>                                                                                                                                                         | (28,171)                                      | -        | (49,173)                                   | 3.8                   |
| <i>Anti</i>                                                                                                                                                         | (178,4)                                       | -        | (171,11)                                   | 5.0                   |
| <b><math>\alpha</math>-D-Glcp-(1<math>\rightarrow</math>2)-<math>\beta</math>-D-Glcp-(1<math>\rightarrow</math>3)-<math>\alpha</math>-D-Glcp-OMe<sup>c)</sup></b>   |                                               |          |                                            |                       |
|                                                                                                                                                                     | ( $\phi_2, \psi_2, \phi_3, \psi_3$ ), deg.    | <i>p</i> | ( $\phi_2, \psi_2, \phi_3, \psi_3$ ), deg. | $\Delta E$ , kcal/mol |
| all- <i>syn</i>                                                                                                                                                     | (-58,-36,66,17)                               | -        | (-53,-58,53,-3)                            | 0.0                   |
| <i>anti-<math>\psi_2</math></i>                                                                                                                                     | (-38,170,90,37)                               | -        | (-21,-151,61,7)                            | 3.4                   |
| <i>anti-<math>\psi_3</math></i>                                                                                                                                     | (-48,-18,43,176)                              | -        | (-56,-61,51,179)                           | 5.3                   |
| <i>anti-<math>\psi_2, \psi_3</math></i>                                                                                                                             | (-23,-175,73,-158)                            | -        | (-26,-159,61,-158)                         | 7.1                   |
| <b><math>\alpha</math>-D-Glcp-(1<math>\rightarrow</math>3)-[<math>\beta</math>-D-Glcp-(1<math>\rightarrow</math>4)]-<math>\alpha</math>-D-Glcp-OMe<sup>c)</sup></b> |                                               |          |                                            |                       |
|                                                                                                                                                                     | ( $\phi_3, \psi_3, \phi_4, \psi_4$ ), deg.    | <i>p</i> | ( $\phi_3, \psi_3, \phi_4, \psi_4$ ), deg. | $\Delta E$ , kcal/mol |
| all- <i>syn</i>                                                                                                                                                     | (-45,-2,63,12)                                | -        | (-42,-12,56,18)                            | 0.0                   |
| <i>anti-<math>\psi_4</math></i>                                                                                                                                     | (-45,18,60,-176)                              | -        | (-33,21,49,-162)                           | 6.0                   |
| <i>anti-<math>\psi_3, \psi_4</math></i>                                                                                                                             | (-34,-178,72,-166)                            | -        | (-40,137,41,-159)                          | 1.3                   |
| <b><math>\beta</math>-D-Glcp-(1<math>\rightarrow</math>2)-<math>\beta</math>-D-Glcp-(1<math>\rightarrow</math>3)-<math>\alpha</math>-D-Glcp-OMe<sup>d)</sup></b>    |                                               |          |                                            |                       |
|                                                                                                                                                                     | ( $\phi_2, \psi_2, \phi_3, \psi_3$ ), deg.    | <i>p</i> | ( $\phi_2, \psi_2, \phi_3, \psi_3$ ), deg. | $\Delta E$ , kcal/mol |
| all- <i>syn</i>                                                                                                                                                     | ( $\sim$ 60, $\sim$ 0, $\sim$ 60, $\sim$ 0)   | 0.91     | (49,-4,39,-8)                              | 0.00                  |
| <i>anti-<math>\phi_2</math></i>                                                                                                                                     | ( $\sim$ 180, $\sim$ 0, $\sim$ 60, $\sim$ 0)  | 0.07     | (169,4,51,-7)                              | 1.04                  |
| <i>anti-<math>\psi_2</math></i>                                                                                                                                     | ( $\sim$ 60, $\sim$ 180, $\sim$ 60, $\sim$ 0) | 0.02     | (43,-153,59,-5)                            | 2.01                  |

a) the NMR+MD values of  $\phi/\psi$  torsional angles and populations (*p*) were taken from: a) Ref.<sup>1</sup>; b) Ref.<sup>2</sup>; c) Ref.<sup>3</sup>; d) Ref.<sup>4</sup>

Table S4. Glycosidic linkage conformers for model oligosaccharides **1-6** (Fig. S1).

| torsion                                                        | molecule | $\phi, \psi$ (deg.)* |                                       |                                     |                      |                                      |
|----------------------------------------------------------------|----------|----------------------|---------------------------------------|-------------------------------------|----------------------|--------------------------------------|
|                                                                |          | MD(ns)               | MD( $\mu$ s)                          | NMR                                 | X-ray                | This work                            |
| <b><math>\alpha</math>-(1-3)</b><br>Man-Man                    | 5,6      | (70,-100)            | (70,-100)<br>(160,-80)                | (80,-100)<br>(60,180)               | (72,-121)            | (57,-139)                            |
| Fuc-GlcNAc                                                     | 4        | (-70,-100)           | (-70,-100)<br>(-150,-145)             | (-72,-96)                           | (-72,-99)            | (-66,-97)                            |
| Fuc-GlcNAc                                                     | 1        | (-70,-110)           | (-75,-105)<br>(-145,-140)<br>(-80,75) | -                                   | -                    | (-72,-100)                           |
| <b><math>\alpha</math>-(1-4)</b><br>Fuc-GlcNAc                 | 3        | (-70,135)            | (-70,135)                             | (-77,142)                           | -                    | (-65,150)                            |
| <b><math>\alpha</math>-(1-6)</b><br>Man-Man                    | 5,6      | (70,-160)            | (70,-160)                             | (64,180)<br>(64,60)                 | (67,179)<br>(60,94)  | (53,174)                             |
| <b><math>\alpha</math>-(2-3)</b><br>NeuAc-Gal                  | 3,4,2    | (60,-120)            | (60,-120)<br>(-50,-140)               | (60,-120)<br>(-60,-120)<br>(20,170) | (69,-125)            | (43,-117)<br>(-22,-143)<br>(25,-164) |
| <b><math>\beta</math>-(1-2)</b><br>GlcNAc-Man <sup>(1→3)</sup> | 6        | (-90,-70)            | (-90,-70)<br>(60,-90)                 | (-92,-83)                           | (80,-98)<br>(58,-87) | (-85,-90)                            |
| GlcNAc-Man <sup>(1→6)</sup>                                    | 6        | (-90,-70)            | (-90,-70)                             | -                                   | -                    | (-77,-96)                            |
| <b><math>\beta</math>-(1-3)</b><br>Gal-GlcNAc                  | 3        | (-70,-110)           | (-70,-110)                            | (-70,-99)                           | (-74,-132)           | (-68,-102)                           |
| <b><math>\beta</math>-(1-4)</b><br>Gal-GlcNAc                  | 4        | (-70,130)            | (-70,130)                             | (-74,138)                           | (-71,132)            | (-70,137)                            |
| Gal-GlcNAc                                                     | 2        | (-70,130)            | (-70,130)<br>(-70,-50)<br>(-150,-100) | -                                   | -                    |                                      |

\*  $\phi$  and  $\psi$  torsions in (1→n) linkages (where n = 2,3,4 or 6) were computed using IUPAC formalism  $\phi =$

$O_5-C_1-O-C_n$  and  $\psi = C_1-O-C_n-C_{(n-1)}$ . The  $\alpha(2\rightarrow3)$  torsions were defined as  $\phi = O_6-C_2-O-C_3$  and  $\psi = C_2-O-$

$C_3-C_2$ .

Table S5. Probabilities, average positions and sizes of the most populated zones for  $\phi/\psi$  torsional angles in disaccharide "eq-eq" linkages

| disaccharide                                  | # of linkages | $p$  | $\phi$ , deg. | $\Delta\phi$ , deg. | $\psi$ , deg. | $\Delta\psi$ , deg. | zone |
|-----------------------------------------------|---------------|------|---------------|---------------------|---------------|---------------------|------|
| $\beta$ -D-GlcpNAc-(1-4)- $\beta$ -D-GlcpNAc  | 3260          | 0.95 | -79.7         | 16.6                | 116.6         | 18.1                | I    |
|                                               |               | 0.03 | 74.9          | 40.3                | 122.4         | 21.9                | III  |
| $\beta$ -D-Manp-(1-4)- $\beta$ -D-GlcpNAc     | 1003          | 0.92 | -87.2         | 19.7                | 111.4         | 20.8                | I    |
|                                               |               | 0.04 | 111.0         | 38.7                | 105.8         | 20.2                | III  |
| $\beta$ -D-Glcp-(1-4)- $\beta$ -D-Glcp        | 550           | 0.98 | -80.3         | 19.2                | 110.5         | 18.6                | I    |
|                                               |               | 0.01 | 63.2          | 4.8                 | 124.7         | 4.7                 | III  |
| $\beta$ -D-Galp-(1-4)- $\beta$ -D-Glcp        | 264           | 0.98 | -76.7         | 16.9                | 117.3         | 20.7                | I    |
| $\beta$ -D-Xylp-(1-4)- $\beta$ -D-Xylp        | 207           | 0.96 | -78.3         | 21.8                | 133.2         | 51.2                | I    |
| $\beta$ -D-Galp-(1-4)- $\beta$ -D-GlcpNAc     | 184           | 0.95 | -74.6         | 13.6                | 122.4         | 16.6                | I    |
|                                               |               | 0.02 | -66.9         | 11.9                | -31.9         | 9.6                 | II   |
| a-D-Neup5Ac-(2-3)- $\beta$ -D-Galp            | 120           | 0.65 | 64.6          | 15.6                | 109.7         | 13.2                | III  |
|                                               |               | 0.03 | -59.1         | 12.8                | 100.8         | 11.5                | I    |
| $\beta$ -D-GlcpNAc-(1-4)- $\alpha$ -D-GlcpNAc | 102           | 0.71 | -86.1         | 27.2                | 110.2         | 19.8                | I    |
|                                               |               | 0.23 | 84.0          | 28.7                | 120.0         | 12.7                | III  |
|                                               |               | 0.05 | -100.4        | 18.5                | -31.8         | 16.2                | II   |
| $\beta$ -D-Glcp-(1-3)- $\beta$ -D-Glcp        | 76            | 1.00 | -83.0         | 17.7                | 120.8         | 17.1                | I    |
| $\beta$ -D-Manp-(1-4)- $\beta$ -D-Manp        | 59            | 0.76 | -77.5         | 14.9                | 108.3         | 22.6                | I    |
| $\beta$ -D-GlcpNAc-(1-3)- $\beta$ -D-Galp     | 58            | 1.00 | -83.1         | 12.1                | -140.4        | 14.3                | II   |
| $\beta$ -D-Galp-(1-4)- $\alpha$ -D-Glcp       | 56            | 0.88 | -74.0         | 10.8                | 120.2         | 17.3                | I    |
|                                               |               | 0.05 | 49.2          | 2.1                 | 126.0         | 1.6                 | III  |
| $\beta$ -D-Manp-(1-3)- $\beta$ -D-Manp        | 41            | 0.76 | -96.9         | 41.8                | -86.6         | 43.7                | II   |
| $\beta$ -D-Manp-(1-4)- $\alpha$ -D-Manp       | 29            | 0.55 | -88.4         | 34.3                | 99.1          | 23.                 | I    |
|                                               |               | 0.34 | -119.9        | 19.6                | -71.1         | 29.1                | II   |
| $\beta$ -D-Galp-(1-3)- $\beta$ -D-GalpNAc     | 46            | 0.98 | -77.4         | 12.6                | -145.4        | 14.6                | II   |
| $\beta$ -D-Manp-(1-4)- $\alpha$ -D-GlcpNAc    | 41            | 0.63 | -81.2         | 16.1                | 109.9         | 31.0                | I    |
| $\beta$ -D-Galp-(1-3)- $\alpha$ -D-GalpNAc    | 42            | 1.00 | -82.7         | 6.8                 | -148.8        | 14.2                | II   |
| $\beta$ -D-Galp-(1-3)- $\beta$ -D-GlcpNAc     | 41            | 1.00 | -69.5         | 14.3                | -114.5        | 19.1                | II   |
| $\beta$ -D-Galp-(1-4)- $\alpha$ -D-GlcpNAc    | 31            | 1.00 | -72.0         | 11.1                | 131.5         | 11.9                | I    |
|                                               |               | 0.71 | -79.1         | 12.4                | 119.8         | 14.5                | I    |
| $\beta$ -D-Glcp-(1-4)- $\alpha$ -D-Glcp       | 28            | 0.21 | -111.5        | 15.1                | -69.7         | 18.4                | II   |
|                                               |               | 0.94 | -69.1         | 13.4                | 154.0         | 9.9                 | I    |
| $\beta$ -D-Xylp-(1-4)- $\alpha$ -D-Xylp       | 18            | 0.94 | -69.1         | 13.4                | 154.0         | 9.9                 | I    |
| $\beta$ -D-ManpA-(1-4)- $\beta$ -D-ManpA      | 19            | 0.84 | -68.1         | 8.8                 | 116.1         | 15.5                | I    |
| $\beta$ -D-GlcpA-(1-3)- $\beta$ -D-GlcpNAc    | 17            | 1.00 | -76.0         | 14.1                | 112.8         | 10.8                | I    |
| $\beta$ -D-GalpNAc-(1-3)- $\beta$ -D-Galp     | 16            | 1.00 | -48.8         | 24.7                | -127.5        | 8.1                 | II   |
| $\beta$ -D-GlcpNAc-(1-4)- $\beta$ -D-GlcpA    | 14            | 1.00 | -67.0         | 9.6                 | 95.9          | 26.4                | I    |

Table S6. Probabilities, average positions and sizes of the most populated zones for  $\phi/\psi$  torsional angles in disaccharide "ax-eq" linkages.

| disaccharide                                  | # of linkages | $p$  | $\phi$ , deg. | $\Delta\phi$ , deg. | $\psi$ , deg. | $\Delta\psi$ , deg. | zone |
|-----------------------------------------------|---------------|------|---------------|---------------------|---------------|---------------------|------|
| $\alpha$ -D-Glcp-(1-4)- $\alpha$ -D-Glcp      | 789           | 0.98 | 96.9          | 19.                 | 109.1         | 15.9                | I    |
|                                               |               | 0.01 | 90.2          | 19.4                | -63.4         | 9.6                 | II   |
| $\alpha$ -D-Manp-(1-3)- $\beta$ -D-Manp       | 542           | 0.98 | 79.9          | 21.6                | -115.1        | 23.7                | II   |
| $\alpha$ -D-Glcp-(1-4)- $\beta$ -D-Glcp       | 348           | 0.94 | 96.4          | 23.0                | 110.3         | 18.5                | I    |
|                                               |               | 0.04 | 105.8         | 18.5                | -58.6         | 24.8                | II   |
| $\alpha$ -D-Manp-(1-3)- $\alpha$ -D-Manp      | 205           | 0.97 | 74.6          | 14.3                | -106.4        | 18.9                | II   |
| $\alpha$ -D-GlcpNAc-(1-4)- $\beta$ -D-GlcpNAc | 165           | 0.75 | 48.8          | 47.7                | 104.6         | 32.4                | I    |
|                                               |               | 0.23 | 77.5          | 13.5                | -22.5         | 17.9                | II   |
| $\alpha$ -D-Manp-(1-4)- $\beta$ -D-GlcpNAc    | 84            | 0.79 | 115.6         | 44.6                | 108.2         | 29.                 | I    |
|                                               |               | 0.15 | 97.2          | 11.9                | -14.5         | 17.7                | II   |
| $\alpha$ -D-Galp-(1-3)- $\beta$ -D-Galp       | 60            | 0.95 | 73.5          | 24.5                | -146.6        | 27.8                | II   |
| $\alpha$ -D-GalpNAc-(1-3)- $\beta$ -D-Galp    | 48            | 1.00 | 54.2          | 7.3                 | -171.9        | 8.2                 | II   |
| $\alpha$ -D-Manp-(1-4)- $\beta$ -D-Manp       | 31            | 0.61 | 84.6          | 18.1                | 109.6         | 20.2                | I    |
| $\alpha$ -D-GlcpA-(1-2)- $\alpha$ -D-Manp     | 18            | 1.00 | 73.7          | 9.11                | 52.3          | 17.4                | I    |
| $\alpha$ -D-Glcp-(1-3)- $\alpha$ -D-Manp      | 13            | 1.00 | 61.2          | 22.1                | -113.6        | 29.6                | II   |

Table S7. Probabilities, average positions and sizes of the most populated zones for  $\phi/\psi$  torsional angles in di-saccharide "ax-ax" linkages

| disaccharide                               | # of linkages | $p$  | $\phi$ , deg. | $\Delta\phi$ , deg. | $\psi$ , deg. | $\Delta\psi$ , deg. |
|--------------------------------------------|---------------|------|---------------|---------------------|---------------|---------------------|
| $\alpha$ -D-Manp-(1-2)- $\alpha$ -D-Manp   | 319           | 0.92 | 77.7          | 19.7                | -107.6        | 32.0                |
| $\alpha$ -D-GalpA-(1-4)- $\alpha$ -D-GalpA | 71            | 1.00 | 88.0          | 25.2                | -119.1        | 30.3                |
| $\alpha$ -D-Galp-(1-4)- $\beta$ -D-Galp    | 38            | 0.97 | 73.2          | 5.9                 | -134.0        | 5.7                 |
| $\alpha$ -D-Galp-(1-2)- $\beta$ -D-Manp    | 14            |      |               |                     |               |                     |

Table S8. Probabilities, average positions and sizes of the most populated zones for  $\phi/\psi$  torsional angles in di-saccharide "eq-ax" linkages

| disaccharide                               | # of linkages | $p$  | $\phi$ , deg. | $\Delta\phi$ , deg. | $\psi$ , deg. | $\Delta\psi$ , deg. |
|--------------------------------------------|---------------|------|---------------|---------------------|---------------|---------------------|
| $\beta$ -D-GlcpNAc-(1-2)- $\alpha$ -D-Manp | 135           | 0.93 | -79.6         | 15.4                | -93.0         | 19.1                |
| $\beta$ -D-Xylp-(1-2)- $\beta$ -D-Manp     | 57            | 0.91 | -83.6         | 10.7                | -107.6        | 7.3                 |
| $\beta$ -D-GalpNAc-(1-4)- $\beta$ -D-Galp  | 26            | 1.00 | -85.4         | 9.6                 | -111.7        | 7.7                 |
| $\beta$ -D-Galp-(1-4)- $\beta$ -D-Galp     | 21            | 1.00 | -93.9         | 12.5                | -116.5        | 7.2                 |



Table S9. Probabilities, average positions and sizes of the most populated zones for  $\phi/\psi$  torsional angles in \*-6 di-saccharide linkages

|          | <i>p</i> | $\phi$ , deg. | $\Delta\phi$ , deg. | $\psi$ , deg. | $\Delta\psi$ , deg. | $\omega$ , deg. | $\Delta\omega$ , deg. |
|----------|----------|---------------|---------------------|---------------|---------------------|-----------------|-----------------------|
| $\alpha$ | 0.48     | 65.1          | 17.9                | 180.2         | 18.4                | 180.3           | 12.6                  |
| (633)    | 0.31     | 71.1          | 17.2                | 171.8         | 18.2                | 60.6            | 15.1                  |
|          | 0.08     | 85.1          | 20.0                | 88.5          | 10.8                | -167.7          | 8.9                   |
|          | 0.07     | 62.7          | 13.1                | 89.1          | 10.6                | 49.8            | 21.3                  |
|          | 0.06     | -54.5         | 24.9                | 185.0         | 37.2                | 26.5            | 75.2                  |
| $\beta$  | 0.54     | -99.6         | 41.7                | -158.5        | 41.3                | 156.7           | 39.9                  |
| (92)     | 0.46     | -92.8         | 50.1                | -170.5        | 65.3                | 10.2            | 48.1                  |

Table S10. Probabilities, average positions and sizes of the most populated zones for  $\phi/\psi$  torsional angles in N- and O- protein-glycan linkages

|                  | # of linkages | <i>p</i> | $\phi$ , deg. | $\Delta\phi$ , deg. | $\psi$ , deg. | $\Delta\psi$ , deg. |
|------------------|---------------|----------|---------------|---------------------|---------------|---------------------|
| $\beta$ -Nag-Asn | 1406          | 0.98     | -98.5         | 20.5                | 177.7         | 9.4                 |
|                  |               | 0.02     | 68.7          | 12.3                | 180.1         | 10.1                |
| $\alpha$ -*-Ser  | 158           | 1.00     | 66.5          | 17.2                | 171.9         | 21.3                |
| $\alpha$ -*-Thr  | 88            | 0.91     | 82.0          | 17.5                | 129.7         | 18.4                |

Table S11. Parameters of the torsional potential (Eq. 4, kcal/mol) for mono- and di-saccharides.

|                                                          | angle                                                                             | $k_{\theta}^1$ | $k_{\theta}^2$ | $k_{\theta}^3$ | phase, deg. |
|----------------------------------------------------------|-----------------------------------------------------------------------------------|----------------|----------------|----------------|-------------|
| C-O-C linkage                                            |                                                                                   |                |                |                |             |
| $\alpha$ -equatorial                                     | $\phi$                                                                            | -3.71          | 0.15           | 0.30           | -           |
|                                                          | $\psi$                                                                            | -1.51          | 1.22           | -0.19          | -           |
| $\alpha$ -axial                                          | $\phi$                                                                            | -0.65          | -1.38          | 1.24           | -           |
|                                                          | $\psi$                                                                            | -              | -              | -              | -           |
| $\beta$ -equatorial                                      | $\phi$                                                                            | -1.71          | -1.60          | 0.94           | -           |
|                                                          | $\psi$                                                                            | -              | -              | -              | -           |
| $\beta$ -axial                                           | $\phi$                                                                            | -1.18          | -2.03          | 0.81           | -           |
|                                                          | $\psi$                                                                            | -              | -              | -              | -           |
| O-linkage                                                |                                                                                   |                |                |                |             |
| $\alpha$                                                 | $\phi$                                                                            | -2.13          | 0.44           | 0.23           | -           |
| $\beta$                                                  | $\phi$                                                                            | -0.31          | 0.35           | 1.85           | -           |
| N-linkage                                                |                                                                                   |                |                |                |             |
| $\alpha$                                                 | $\phi$                                                                            | -              | -              | -0.64          | 160.        |
| $\beta$                                                  | $\phi$                                                                            | -              | -              | 1.40           | -90.        |
| 6-linkage                                                | $\psi$                                                                            | -0.52          | 0.70           | 0.64           | -           |
| O5 equatorial                                            |                                                                                   |                |                |                |             |
|                                                          | $\omega$                                                                          | -0.17          | 1.30           | 1.50           | -           |
|                                                          |                                                                                   | -1.30          | -              | -              | 300.0       |
| O5 axial                                                 |                                                                                   |                |                |                |             |
|                                                          | $\omega$                                                                          | -0.59          | 0.26           | 1.52           | -           |
|                                                          |                                                                                   | 1.40           | -              | -              | 300.0       |
| $\alpha$ -sia, $\beta$ -sia                              | O <sub>9</sub> -C <sub>9</sub> -C <sub>8</sub> -C <sub>7</sub>                    | 0.03           | 0.42           | 2.18           | -           |
| $\alpha$ -sia, $\beta$ -sia                              | C <sub>9</sub> -C <sub>8</sub> -C <sub>7</sub> -C <sub>6</sub>                    | -0.44          | -0.34          | 2.29           | -           |
| $\alpha$ -gcu, $\beta$ -gcu, $\alpha$ -sia, $\beta$ -sia | O <sub>1<math>\alpha</math></sub> -C <sub>1</sub> -C <sub>2</sub> -O <sub>5</sub> | -              | 0.89           | -              | -           |
| $\alpha$ -Nag, $\beta$ -Nag, $\alpha$ -Nga, $\beta$ -Nga | C-N-C-C                                                                           | -1.47          | 0.64           | -0.39          | -120.       |

Table S12. Results of local energy minimizations carried out for crystals of monosaccharides with the ICMFF nonbonded parameters.

| Name/<br>CSD ref. code                               | Space group       | $\Delta a, \%^a$ | $\Delta b, \%^a$ | $\Delta c, \%^a$ | $\Delta \gamma, \%^a$ | $\Delta H_{\text{subl}},$<br>kcal/mol                        | $E,$<br>kcal/mol |
|------------------------------------------------------|-------------------|------------------|------------------|------------------|-----------------------|--------------------------------------------------------------|------------------|
| $\alpha$ -D-glucose/<br>GLUCSA03                     | $P2_12_12_1, Z=4$ | -1.7             | -2.3             | -0.7             | -                     | $33.2 \pm 1.9$ <sup>5</sup> ;<br>$46.5 \pm 1.2$ <sup>6</sup> | -40.0            |
| $\beta$ -D-glucose<br>/GLUCSE02                      | $P2_12_12_1, Z=4$ | -2.4             | 4.3              | -4.5             | -                     | -                                                            | -38.2            |
| $\alpha$ -D-galactose/<br>ADGALA03                   | $P2_12_12_1, Z=4$ | -0.4             | -1.8             | -0.4             | -                     | -                                                            | -37.5            |
| $\beta$ -D-galactose/<br>BDGLOS01                    | $P2_12_12_1, Z=4$ | 3.4              | -3.8             | -2.8             | -                     | -                                                            | -44.4            |
| $\alpha$ -D-mannose/<br>ADMANN                       | $P2_12_12_1, Z=8$ | -2.2             | -0.7             | -2.9             | -                     | -                                                            | -38.3            |
| $\alpha$ -L-fucose/<br>ALFUCO                        | $P2_12_12_1, Z=4$ | 0.9              | -2.0             | 2.9              | -                     | -                                                            | -28.8            |
| N-acetyl- $\alpha$ -D-<br>glucosamine/<br>ACGLUA11   | $P2_1, Z=2$       | 0.2              | -2.7             | -0.7             | 1.4                   | -                                                            | -46.7            |
| N-acetyl- $\alpha$ -D-<br>galactosamine/<br>AGALAM01 | $P2_1, Z=2$       | -1.1             | -3.6             | 1.3              | 0.8                   | -                                                            | -46.9            |

<sup>a</sup> computed as  $100\% \cdot (x_{\text{exp}} - x) / x_{\text{exp}}$ , where  $x$  is a unit cell parameter  $a$ ,  $b$ ,  $c$ , or  $\gamma$ .

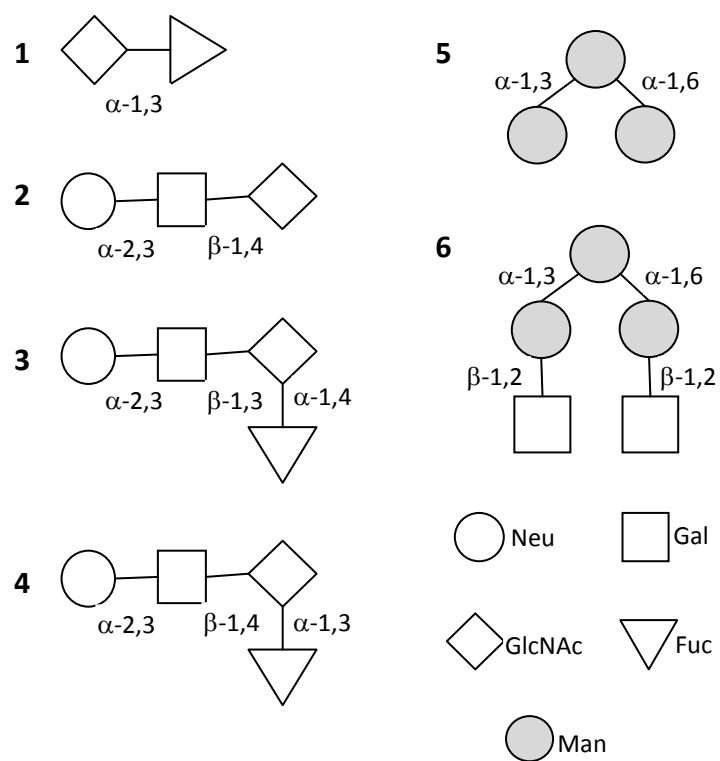

Figure S1. Model oligosaccharides: constituent di and tri-saccharides **1-2**, sialyl Lewis<sup>a</sup> **3**, sialyl Lewis<sup>x</sup> **4**, mannotriose **5**, biantennary N-linked core pentasaccharide **6**. Symbols are N-acetyl- $\alpha$ -D-neuraminic acid (NeuAc),  $\beta$ -D-galactose (Gal), N-acetyl- $\beta$ -D-glucosamine (GlcNAc),  $\alpha$ -L-fucose (Fuc), and  $\alpha$ -D-mannose (Man).

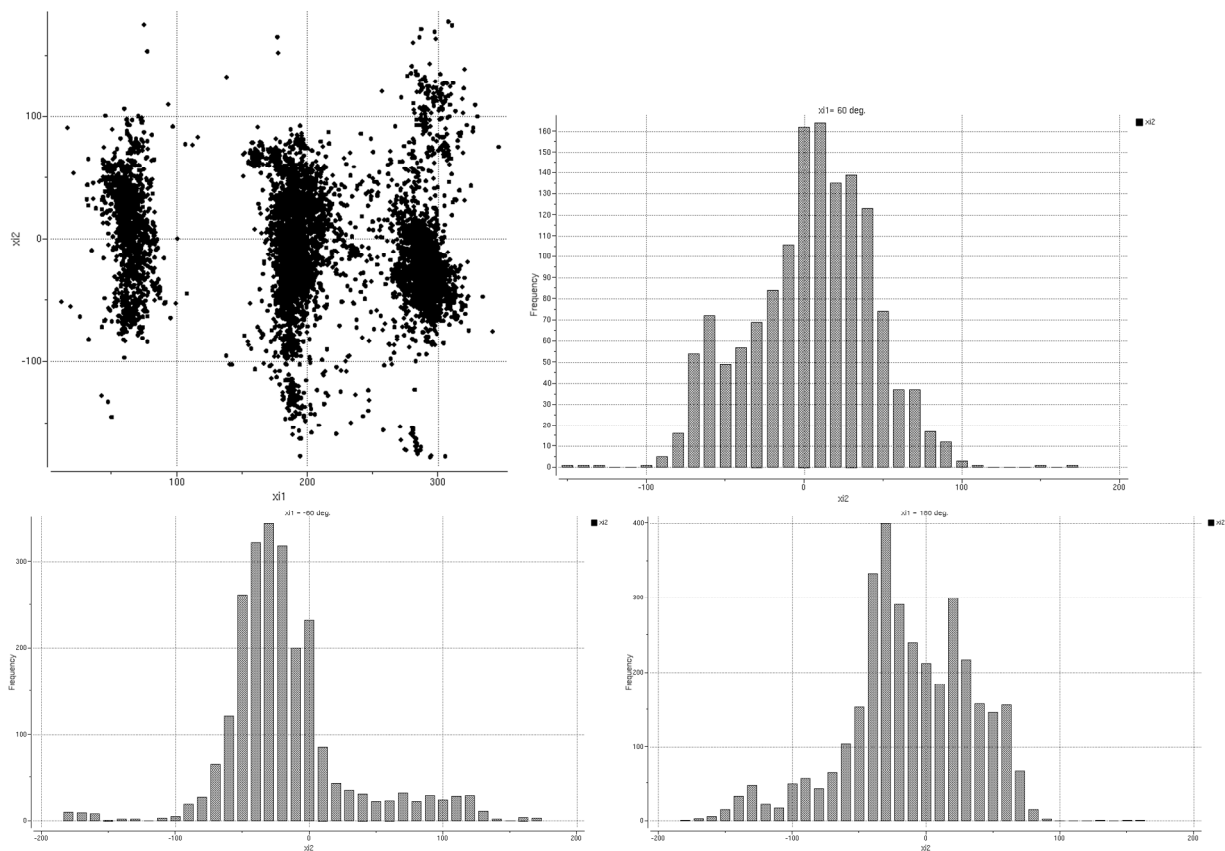

Figure S2. Distribution of  $\chi_1/\chi_2$  angles in high-resolution PDB structures of glycoproteins with  $\beta^*$ -Asn linkages

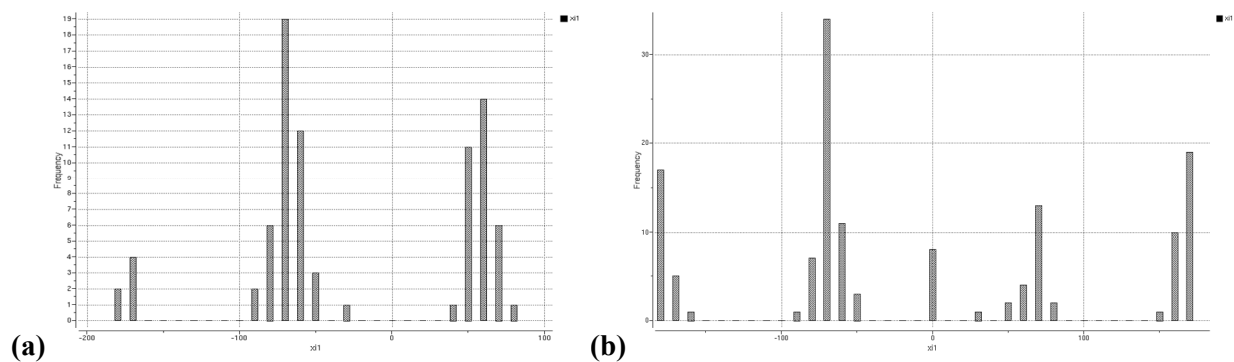

Figure S3. Distribution of  $\chi_1$  torsional angles in high-resolution PDB structures of glycoproteins with O-linkages: (a) Thr; (b) Ser

- (1) Larsson, E. A.; Staaf, M.; Söderman, P.; Höög, C.; Widmalm, G. *J. Phys. Chem. A* **2004**, *108*, 3932.
- (2) Dabrowski, J.; Kozar, T.; Grosskurth, H.; Nifant'ev, N. E. *J. Am. Chem. Soc.* **1995**, *117*, 5534.
- (3) Dixon, A. M.; Venable, R.; Widmalm, G.; Bull, T. E.; Pastor, R. W. *Biopolymers* **2003**, *69*, 448.
- (4) Hoog, C.; Landersjo, C.; Widmalm, G. *Chemistry* **2001**, *7*, 3069.
- (5) Kabo, G. J.; Voitkevich, O. V.; Blokhin, A. V.; Kohut, S. V.; Stepurko, E. N.; Paulechka, Y. U. *J. Chem. Thermodynamics*. **2013**, *59*, 87.
- (6) Oja, V.; Suuberg, E. M. *J. Chem. Eng. Data* **1999**, *44*, 26.
